# Supplementary material for: Bacterial Communities in Lanna Phak-Gard-Dong (Pickled Mustard Green) from Three Different Ethnolinguistic Groups in Northern Thailand
Source: MDPI journal article supplement (doi:10.3390/biology11010150), 2022-01-17
Supplement: s1 [file s1]

**Table S1.** The pH values and amount of lactic acid bacteria (LAB) in Karen, Lawa, and Shan Phak-gard-dong (PGD) at day 3 of fermentation.

| Sample    | pH        | LAB (log CFU/g or mL) |
|-----------|-----------|-----------------------|
| Karen PGD | 4.33±0.03 | 8.28±0.03             |
| Lawa PGD  | 5.95±0.12 | 7.87±0.03             |
| Shan PGD  | 4.63±0.03 | 8.24±0.03             |
